# Supplementary material for: Effects of an oral synbiotic on the gastrointestinal immune system and microbiota in patients with diarrhea-predominant irritable bowel syndrome
Source: Springer Nature journal article supplement (doi:10.1007/s00394-018-1826-7), 2018-09-24
Supplement: MOESM3 [file 16147472]

Suppl. Table 1. Mucosal immune cells

l.c.<sup>a</sup>, living cells from the lymphocyte gate; l.c.<sup>b</sup>, living cells of the lympho-monocyte gate; ns: not significant

|                | cell type                         | function                  | unit                   | median pre | median post | p     |
|----------------|-----------------------------------|---------------------------|------------------------|------------|-------------|-------|
| Duodenum       |                                   |                           |                        |            |             |       |
|                | CD3+                              | T cell                    | [% l.c. <sup>a</sup> ] | 10.7       | 8.9         | ns    |
|                | CD3+4+                            | T helper                  | [% CD3+]               | 19.4       | 23.8        | ns    |
|                | CD3+8+                            | cytotoxic T lymphocyte    | [% CD3+]               | 29.7       | 20.7        | ns    |
|                | CD3+4+25+127-                     | Treg                      | [% CD4+]               | 1.2        | 1.5         | ns    |
|                | CD3+4+8+                          | double-positive T cell    | [% CD3+]               | 6.6        | 8.1         | ns    |
|                | CD3+4-8-                          | double-negative T cell    | [% CD3+]               | 22.9       | 23.4        | ns    |
|                | CD3+56+16+                        | natural killer T cell     | [% CD3+]               | 11.0       | 13.1        | ns    |
|                | CD3-56+16+                        | natural killer cell       | [% l.c. <sup>a</sup> ] | 4.5        | 3.0         | ns    |
| Proximal Colon |                                   |                           |                        |            |             |       |
|                | CD3+                              | T cell                    | [% l.c. <sup>a</sup> ] | 20.3       | 20.7        | ns    |
|                | CD3+4+                            | T helper                  | [% CD3+]               | 59.1       | 54.7        | 0.042 |
|                | CD3+8+                            | cytotoxic T lymphocyte    | [% CD3+]               | 21.8       | 18.8        | ns    |
|                | CD3+4+25+127-                     | Treg                      | [% CD4+]               | 6.0        | 6.2         | ns    |
|                | CD3+4+8+                          | double-positive T cell    | [% CD3+]               | 1.9        | 2.3         | ns    |
|                | CD3+4-8-                          | double-negative T cell    | [% CD3+]               | 10.9       | 16.2        | ns    |
|                | CD3+56+16+                        | natural killer T cell     | [% CD3+]               | 2.6        | 2.0         | ns    |
|                | CD3-56+16+                        | natural killer cell       | [% l.c. <sup>a</sup> ] | 3.3        | 2.7         | ns    |
|                | CD3-14-16-19-20-56-34-HLA-DR+     | dendritic cell            | [‰ l.c. <sup>b</sup> ] | 2.6        | 2.6         | ns    |
|                | CD3-14-16-19-20-56-34-HLA-DR+103+ | regulatory dendritic cell | [‰ l.c. <sup>b</sup> ] | 0.7        | 0.6         | ns    |
|                | CD3-14-16-19-20-56-34-HLA-DR+11c+ | 11c+ dendritic cell       | [‰ l.c. <sup>b</sup> ] | 2.4        | 2.3         | ns    |
