# Supplementary material for: Effects of an oral synbiotic on the gastrointestinal immune system and microbiota in patients with diarrhea-predominant irritable bowel syndrome
Source: Springer Nature journal article supplement (doi:10.1007/s00394-018-1826-7), 2018-09-24
Supplement: MOESM4 [file 16147472]

Suppl. Table 2. Mucosal cytokine levels

ns: not significant

|                 | <b>cytokine type</b> | <b>unit</b> | <b>median pre</b> | <b>median post</b> | <b>p</b> |
|-----------------|----------------------|-------------|-------------------|--------------------|----------|
| <b>Duodenum</b> |                      |             |                   |                    |          |
|                 | TNF alpha            | [pg/ml]     | 2.4               | 2.8                | ns       |
|                 | IL12p40              | [pg/ml]     | 6.7               | 6.8                | ns       |
|                 | IL12p70              | [pg/ml]     | 1.4               | 1.3                | ns       |
|                 | IL6                  | [pg/ml]     | 10.3              | 9.4                | ns       |
|                 | IL23                 | [pg/ml]     | 0.3               | 4.2                | ns       |
|                 | IL17                 | [pg/ml]     | 0.5               | 0.7                | ns       |
|                 | IL10                 | [pg/ml]     | 0.2               | 0.3                | ns       |
|                 | IL1beta              | [pg/ml]     | 3.3               | 3.0                | ns       |
| <b>Colon</b>    |                      |             |                   |                    |          |
|                 | TNF alpha            | [pg/ml]     | 0.2               | 0.6                | 0.0547   |
|                 | IL12p40              | [pg/ml]     | 11.2              | 5.9                | ns       |
|                 | IL12p70              | [pg/ml]     | 0.6               | 0.8                | ns       |
|                 | IL6                  | [pg/ml]     | 0.0               | 0.0                | ns       |
|                 | IL23                 | [pg/ml]     | 0.0               | 0.0                | ns       |
|                 | IL17                 | [pg/ml]     | 0.0               | 0.0                | ns       |
|                 | IL10                 | [pg/ml]     | 0.1               | 0.1                | ns       |
|                 | IL1beta              | [pg/ml]     | 4.2               | 3.5                | ns       |
