# Supplementary material for: Effects of an oral synbiotic on the gastrointestinal immune system and microbiota in patients with diarrhea-predominant irritable bowel syndrome
Source: Springer Nature journal article supplement (doi:10.1007/s00394-018-1826-7), 2018-09-24
Supplement: MOESM5 [file 16147472]

Suppl. Table 3. Mucosal Microbial Diversity depicted by using Phylogenetic Diversity, Observed Species and Shannon Diversity

PD: Phylogenetic diversity; ns: not

| <b>Region</b>  | <b>PD</b> | <b>Observed Species</b> | <b>Shannon Diversity Index</b> |
|----------------|-----------|-------------------------|--------------------------------|
| gastric corpus | 0.008     | ns                      | ns                             |
| duodenum       | 0.003     | 0.011                   | ns                             |
| proximal colon | ns        | ns                      | ns                             |
| feces          | ns        | ns                      | ns                             |
